# Supplementary material for: High incidence of plasmid-mediated quinolone resistance genes among ciprofloxacin-resistant clinical isolates of Enterobacteriaceae at a tertiary care hospital in Puducherry, India
Source: PeerJ. 2016 May 5;4:e1995. doi: 10.7717/peerj.1995 (PMC4860338; doi:10.7717/peerj.1995)
Supplement: Data S1 [file peerj-04-1995-s001.docx]

| **Annual Fluoroquinolone Prescribing Data** | | | | | | | | | | | | | | | | |
| --- | --- | --- | --- | --- | --- | --- | --- | --- | --- | --- | --- | --- | --- | --- | --- | --- |
| MONTH | Year | | | | | | | | | | | | | | | |
| 2012 | | | | 2013 | | |  | 2014 | | |  | 2015 | | |  |
| Ciprofloxacin Tablets  (500 mg) | Levofloxacin Tablets  (500 mg) | Ciprofloxacin IV  (200mg/100mL) | Ofloxacin IV  (200mg/100mL) | Ciprofloxacin Tablets  (500 mg) | Levofloxacin Tablets  (500 mg) | Ciprofloxacin IV  (200mg/100mL) | Ofloxacin IV  (200mg/100mL) | Ciprofloxacin Tablets  (500 mg) | Levofloxacin Tablets  (500 mg) | Ciprofloxacin IV  (200mg/100mL) | Ofloxacin IV  (200mg/100mL) | Ciprofloxacin Tablets  (500 mg) | Levofloxacin Tablets  (500 mg) | Ciprofloxacin IV  (200mg/100mL) | Ofloxacin IV  (200mg/100mL) |
| January | 22920 | NA | 1970 | NA | 34070 | NA | 710 | NA | 29510 | 1183 | 1282 | 52 | 39580 | NA | 1089 | 60 |
| February | 26870 | 1210 | 28340 | 777 | 23860 | 953 | 1395 | 64 | 23740 | 1515 | 50 |
| March | 21070 | 995 | 26230 | 871 | 15710 | 1054 | 1665 | 30 | 25918 | 1455 | 65 |
| April | 22960 | 780 | 29050 | 791 | 28270 | 830 | 1055 | 50 | 34570 | 1323 | 67 |
| May | 28690 | 3215 | 25870 | 1451 | 25950 | 956 | 900 | 75 | 33221 | 1570 | 71 |
| June | 23660 | 1355 | 11670 | 1358 | 12220 | 740 | 1725 | 51 | 29831 | 1321 | 59 |
| July | 44120 | 1245 | 26600 | 1691 | 31570 | 460 | 1153 | 47 | 23471 | 1229 | 43 |
| August | 32340 | 1380 | 24780 | 2450 | 9930 | Out of Stock | 1770 | 53 | 36270 | 1340 | 72 |
| September | 30510 | 1470 | 30740 | 1560 | 34590 | 1510 | 1280 | 71 | 33216 | 819 | 89 |
| October | 14770 | 1285 | 22720 | 1390 | 26620 | 1130 | 1288 | 112 | 27890 | 721 | 53 |
| November | 21480 | 1743 | 23570 | 981 | 18020 | 900 | 1453 | 87 | 23690 | 1081 | 67 |
| December | 27290 | 1546 | 23280 | 1013 | 26690 | 1030 | 2345 | 75 | 24519 | 1321 |  |
